# Synaptic plasticity onto inhibitory neurons as a mechanism for ocular dominance plasticity.

JACOPO BONO<sup>1</sup>, CLAUDIA CLOPATH<sup>1</sup>

## Abstract

Ocular dominance plasticity is a well-documented phenomenon allowing us to study properties of cortical maturation. Understanding this maturation could be an important step towards unravelling how cortical circuits function. It is still not fully understood which mechanisms are responsible for the opening and closing of the critical period for ocular dominance and how changes in cortical responsiveness arise after visual deprivation. In this article, we present a theory for these mechanisms. Following recent experimental work, we hypothesize that in both juvenile and adult animals a reduction in inhibition is necessary for ocular dominance plasticity. We modelled how excitatory-to-inhibitory synaptic plasticity enables a drop in inhibition which in turn permits the shift in ocular dominance. Our model also provides a possible explanation to why some neurons shift counter-intuitively towards the closed eye. Finally, we discuss possible mechanisms underlying the opening and closing of the critical period.

## INTRODUCTION

Throughout development, sensory cortex can experience periods of heightened sensitivity to sensory inputs. The rewiring of neuronal networks is very flexible during these periods, but there is less such plasticity otherwise. Having normal sensory experiences during these periods is crucial for a healthy maturation of the brain and they are therefore called critical periods (CP).

A well studied example is the critical period for ocular dominance (OD) in primary visual cortex (V1). In the visual pathway, inputs from both eyes usually converge onto the same neuron for the first time in V1, although a fraction of thalamic neurons already exhibits binocularity in mice [Jaepel et al., 2017, Sommeijer et al., 2017, Jeon and Kuhlman, 2017]. The extent to which a neuron's visually-evoked activity is dominated by one of the eyes is called ocular dominance (OD) and is often quantified by the ocular dominance index (ODI). In each hemisphere of mice V1 the overall response to the contralateral eye is roughly twice as high as that to the ipsilateral eye, but individual neurons display a broad range of ODI values.

During a limited period early in the development, closure of one eye for multiple days triggers a shift in neuronal responses in visual cortex towards the open eye. In mice, this critical period spans about ten days, starting around postnatal day 20. The changes in neuronal responses following this monocular deprivation (MD) can be roughly separated into two phases. In a first

---

<sup>1</sup>Department of Bioengineering, Imperial College London, South Kensington Campus, London SW7 2AZ, UK. Correspondence and requests for materials should be addressed to C.C. (email: c.clopath@imperial.ac.uk).

phase, observed during the first three days of deprivation, the responses to the closed eye are depressed while responses to open-eye inputs remain similar. This effect is often called response depression. For longer deprivations, a second phase follows where the neuronal responses to the open eye are increased, called response potentiation. In this second phase, also the neuronal activity caused by the closed eye increases, but to a lesser extent [Frenkel and Bear, 2004]. Further insights into the working of ocular dominance plasticity are uncovered by studying other deprivation paradigms. Firstly, binocular deprivation (BD) does not lead to OD shifts, hinting at some level of competition depending on the strength or coherence of the inputs from both eyes. Secondly, monocular inactivation (MI) abolishes the rapid response depression, suggesting that this response depression is activity dependent, relying on spontaneous activity and residual activity caused by light travelling through the closed eyelid during MD [Frenkel and Bear, 2004].

Before and after the critical period, the effects of monocular deprivation on ocular dominance plasticity are either reduced or not observed at all. In pre-CP mice, monocular deprivation leads to a decrease in activity from both eyes, thus not changing their relative strengths and not affecting the overall ocular dominance [Smith and Trachtenberg, 2007]. In adult mice, the response depression after short monocular deprivation is not observed. However, longer deprivation still leads to the response potentiation of the open eye, and hence a certain shift in ocular dominance can still be observed [Sawtell et al., 2003].

A key player in regulating the opening of the critical period is the maturation of inhibition. GAD95-KO mice, which exhibit an impaired  $\gamma$ -aminobutyric acid (GABA) release, never experience a critical period and visual cortex remains in a juvenile state. A critical period can be opened in these mice once per lifetime after diazepam infusion, which restores the GABA release. Similarly, diazepam infusion before normal CP onset can accelerate the start of the CP in wild-type mice [Fagiolini and Hensch, 2000]. Furthermore, a recent experimental study investigated changes in cortical layer II/III excitation and inhibition in juvenile animals after only 24 hours of deprivation [Kuhlman et al., 2013]. The authors found that the firing rate of parvalbumin-positive (PV+) inhibitory neurons is decreased at that time, while the firing rate of excitatory neurons is increased. Moreover, they show that this decreased inhibition is predominantly mediated by a reduction in excitatory drive from layer IV and V to these PV+ neurons. Interestingly, this reduction of inhibition is not observed in adult animals. The authors then linked this effect to the OD shift, by showing how pharmacological enhancement of inhibition during the critical period prevents any OD plasticity, while pharmacological reduction of inhibition in the adult animals results in an OD shift towards the open eye. It was therefore postulated that OD plasticity depends on the increased firing rate of open eye inputs, caused by a transient reduction in inhibition.

The mechanisms behind the closure of the critical period remain more enigmatic. However, several manipulations can reopen a window for OD plasticity in adult mice. Firstly, reducing inhibition was shown to enhance the OD plasticity caused by monocular deprivation [Harauzov et al., 2010, Kuhlman et al., 2013]. Related to this, adult mice in enriched environments were shown to have reduced levels of inhibition and OD plasticity [Greifzu et al., 2014]. Finally, high contrast stimulation during deprivation also leads to OD shifts [Matthies et al., 2013], suggesting that enhancing visually evoked responses of the open eye could be functionally similar to reducing cortical inhibition. Other mechanisms that have been implied with the ending of the critical period are changes in the extracellular matrix [Pizzorusso, 2002] and the pruning of silent synapses [Huang et al., 2015].

Taken together, experimental results hint at a visual-experience dependent maturation of V1, where normal visual stimuli are necessary to shape the network connectivity. In this article we follow the hypothesis that a reduced inhibition is the key to allow for plasticity. More specifi-

cally, we model a neuronal network and propose synaptic plasticity principles that are able to reproduce many of the results discussed above. In our model, excitatory-to-inhibitory plasticity is responsible for a rapid reduction in inhibition during the CP, which in turn enables a shift in ocular dominance. Furthermore, we discuss possible mechanisms underlying the opening and closing of the critical period. Finally, our model provides a possible explanation to why some neurons shift counter-intuitively towards the closed eye and why these neurons tend to have lower firing rates.

## RESULTS

### 1. Unifying juvenile and adult OD plasticity

The experimental observation that increasing the inhibition in pre-CP animals [Fagiolini and Hensch, 2000] and decreasing the inhibition in adult animals [Harauzov et al., 2010] allows for OD plasticity, naturally leads to a two-level inhibition hypothesis. More specifically, a first increase in inhibition would open the critical period and a further increase of inhibition would close it. However, the results by Kuhlman et al. [Kuhlman et al., 2013] allow for a different interpretation. Indeed, the authors showed that even during the critical period, a reduction of inhibition is necessary to observe OD plasticity. The authors therefore proposed that the increased levels of inhibition are crucial in opening the critical period because a subsequent reduction of inhibition can amplify the open-eye excitatory activity.

Moreover, stimulating adult animals with high contrast gratings also leads to fast OD plasticity [Matthies et al., 2013]. We can then unify all the results by stating that an OD shift towards the open eye is possible when the open-eye responses are transiently increased. This could be either by reducing inhibition, or by enhancing excitation. Thus, we hypothesise the following:

- The loss of input after monocular deprivation shifts both open-eye and closed-eye pathways towards depression. No OD shift would be observed at this point.
- Boosting the open-eye inputs, for example by a quick reduction inhibition, pushes the open-eye, but not the closed-eye inputs over a threshold for potentiation. This leads to the depression of closed-eye inputs while maintaining open eye responses.

To test this hypothesis in simulated networks, we first consider a toy model where a single neuron representing a layer II/III pyramidal cell receives feedforward excitatory input from a population of layer IV neurons and feedforward inhibition from one inhibitory neuron (Fig. 1a ). The feedforward excitatory synapses onto the layer II/III neuron are plastic, while other synapses are static. Assuming  $\rho_{pre}$  and  $\rho_{post}$  are the presynaptic and postsynaptic firing rates respectively, we use the following Hebbian excitatory learning rule (see Methods section for more details). If the the product ( $\rho_{pre} \cdot \rho_{post}$ ) caused by an input exceeds a threshold  $\theta$ , the synaptic weight is increased by an amount  $\eta$ . If this value remains below  $\theta$ , the value is decreased by  $\eta$ . The parameter  $\theta$  therefore is a constant threshold separating synaptic depression from synaptic potentiation, and  $\eta$  is the learning rate. In this way, layer IV synapses with various ODIs onto the same layer II/III neuron will lead to different values for ( $\rho_{pre} \cdot \rho_{post}$ ) after deprivation. Indeed, a layer IV neuron that is dominated by the deprived eye, will be left with a small value for  $\rho_{pre}$  after MD, while a layer IV neuron dominated by the open eye will be relatively unaffected and have a high  $\rho_{pre}$  (Fig. 1b). Moreover, MD will also reduce the postsynaptic firing rate  $\rho_{post}$  of the layer II/III neuron by an amount depending on its ocular dominance index. Finally we initialize the feedforward excitatory weights at the upper bound.

In this model, we first assume that monocular deprivation pushes all possible ( $\rho_{pre} \cdot \rho_{post}$ ) values into the long-term depression (LTD) regime by reducing  $\rho_{pre}$  and  $\rho_{post}$ . Since all synapses are depressed equally, this does not affect the relative response strength between the eyes and therefore leaves the ODI unaltered. Secondly, a reduction of inhibition can rescue the original postsynaptic firing rate and hence shifts only the ( $\rho_{pre, open} \cdot \rho_{post}$ ) above the long-term potentiation (LTP) threshold  $\theta$ . Here, by  $\rho_{pre, open}$  we mean the presynaptic rates corresponding to open-eye dominated neurons. Only after this reduction of inhibition, the ocular dominance shifts by depressing the closed-eye inputs while maintaining the open-eye inputs (Fig. 1b).

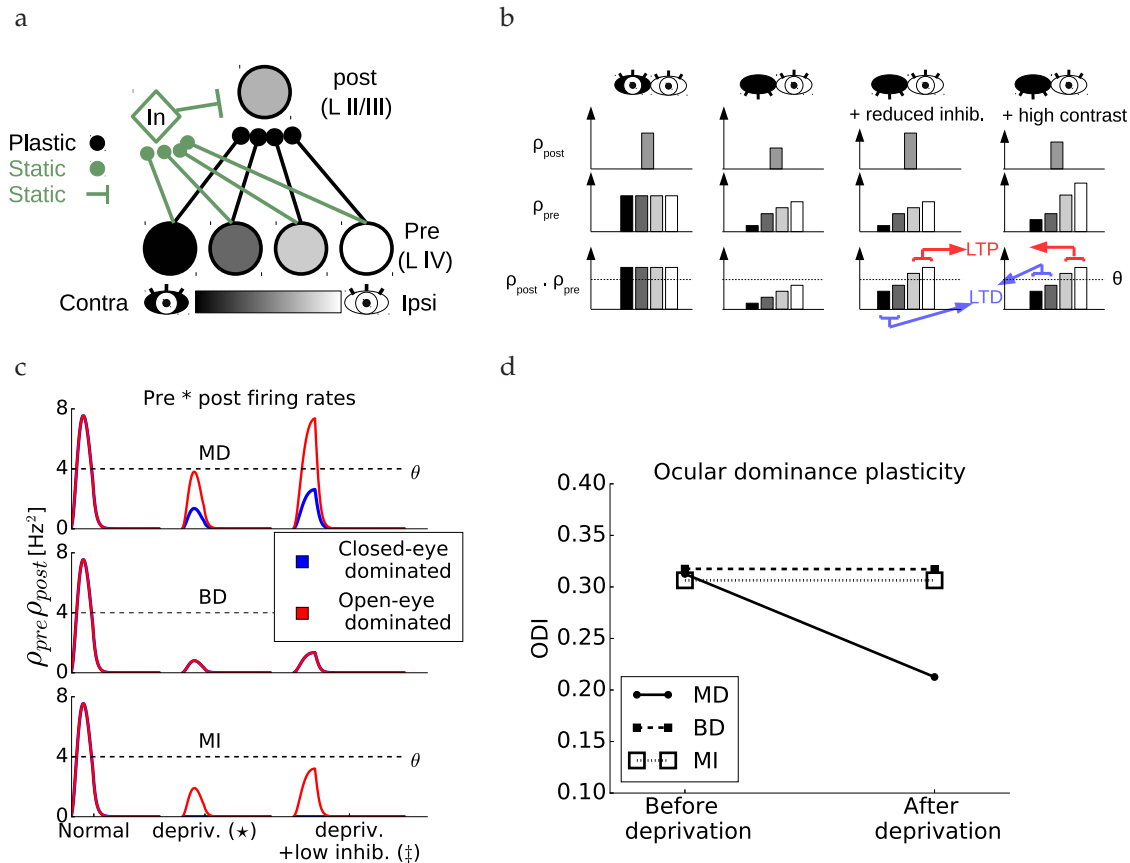

**Figure 1 Toy model.** (a) Schematic of the model. One postsynaptic neuron receives inputs from a population of presynaptic neurons, each with different ODI. We use a grey-scale color scheme where darker colors denote contralateral-eye dominated neurons and brighter colors denote ipsilateral-eye dominated neurons. (b) Schematic of pre- and postsynaptic firing rates under normal rearing (left), monocular deprivation of the contralateral eye (second from left), monocular deprivation with a reduced inhibition (second from right) and monocular deprivation with high contrast inputs (right). The bottom row depicts the product between pre- and postsynaptic firing rates, and the threshold  $\theta$  separating LTD from LTP. (c) Example traces of the product of presynaptic and postsynaptic firing rates of the neurons during monocular deprivation (MD), binocular deprivation (BD) and monocular inactivation (MI). For red and blue traces, the product is taken with the most open-eye dominated and closed-eye dominated presynaptic neuron respectively. (d) Ocular dominance index of the postsynaptic neuron at the beginning of the simulation versus the end.

## 2. Simulating deprivation

We connect 50 presynaptic neurons to one postsynaptic excitatory neuron and one inhibitory neuron, each modelled as rate units. The presynaptic neurons have a broad range of ODIs (see Methods and Supp. Fig. 1a). In this toy model, only the layer IV to layer II/III excitatory inputs are plastic and initialized at the upper bound. When both eyes are open, all these excitatory inputs are in the LTP regime and therefore remain at the upper bound (Fig. 1c, top left). We then simulate monocular deprivation by reducing the input of the contralateral eye to a third of its original value. We allow this residual activity in order to model attenuated light travelling through the eyelid. The closure of the eye therefore reduces the firing rates and all synapses undergo LTD (Fig. 1c, top middle). We subsequently reduce the feedforward excitatory-to-inhibitory connections to a third of the initial value, mimicking the results from Kuhlman et al. [Kuhlman et al., 2013]. This reduction of inhibition leads to a recovery of the original postsynaptic excitatory firing rate. Now only the feedforward connections from presynaptic neurons dominated by the closed eye are depressed, while the potentiation of the open eye pathway brings the respective synapses back to the upper bound (Fig. 1a, top right). This depression of the closed-eye pathway ultimately leads to a OD shift toward the open eye (Fig. 1d).

The same model can also reproduce the lack of OD plasticity after binocular deprivation. In this case, both eyes are sutured and therefore all inputs are reduced to a third of the original values. Since all presynaptic firing rates are attenuated by an equal amount, all  $(\rho_{\text{pre}} \cdot \rho_{\text{post}})$  have the same value. This ensures that the open-eye and closed-eye inputs will always have the same direction of plasticity. In our case, they are all in the LTD region and therefore depressed (Fig. 1c middle row, d).

In the case of monocular inactivation, TTX injection in the retina abolishes all neuronal activity. This is in contrast with monocular deprivation, where spontaneous activity is present and some light can travel through the sutured eyelid. Experimentally, no ocular dominance shift is observed after monocular inactivation, suggesting that the residual activity is important. Similar to BD, the total amount of neuronal activity is lower under MI than under MD. However, unlike BD the presynaptic inputs strengths are now variable, depending on the ODI of the respective input. This resembles the situation under MD, but with all input strengths shifted to lower values. With an appropriate choice for the threshold  $\theta$ , we can therefore still obtain that all synapses are depressed, and hence no OD shift is observed in our postsynaptic neuron (Fig. 1c bottom row, d).

## 3. Heterogeneity in OD shifts

Recent work by Rose et al. [Rose et al., 2016] uncovered a substantial degree of heterogeneity in OD plasticity of individual neurons after monocular deprivation. About 40% of the neurons in layer II/III do not show any particular plasticity, while the amount and direction of the shift in the remaining 60% is variable. Indeed, some neurons even shift their responses counter-intuitively towards the closed eye. The latter neurons were shown to have lower visually-evoked activities and the counter-intuitive shift was caused by a depression of the open-eye inputs. Counter-intuitive shifts were also observed in a study with cats, where a global counter-intuitive shift towards the closed eye occurred after increasing the inhibition during the monocular deprivation [Reiter and Stryker, 1988].

Most neurons in layer IV receive inputs coming from both eyes and project to layer II/III neurons. If these layer IV neurons all have too similar ocular dominance, all synapses will be modified in a similar way under our learning rule and no OD shift will be observed. Indeed, it is highly

unlikely that the threshold  $\theta$  will fall somewhere within this narrow distribution (Fig. 2a). For layer II/III neurons to show OD plasticity, the difference between the minimum and maximum ODI of incoming layer IV inputs must therefore be large enough (Supp. Fig. 2a,b). Assuming a variety of OD distributions for the inputs would therefore suffice to reproduce non-plastic neurons and shifts towards the open eye of different magnitude, but not the counter-intuitive shifts towards the closed eye.

In order to reproduce these counter-intuitive shifters, we adapt our plasticity rule to contain a second threshold. Besides the threshold separating the LTD region from the LTP region, we introduce a lower threshold which separates a no-plasticity region from the LTD region. We can then understand the counter-intuitive shifters as follows. Neurons receiving low-rate input and/or firing at low rates exhibit smaller values of  $(\rho_{\text{pre}} \cdot \rho_{\text{post}})$  compared to Fig. 1. Subsequently, the closed-eye pathway could fall below the lower threshold for plasticity and would not be altered, while the open-eye pathway would be in the depression regime (Fig. 2b). This results in a counter-intuitive shift where the closed eye gains strength relative to the open eye (Fig. 2c,d).

Finally, with this modified learning rule, we could set our thresholds so that the  $(\rho_{\text{pre}} \cdot \rho_{\text{post}})$  fall below the threshold for plasticity immediately after deprivation but before the reduction of inhibition. With this choice, the synapses would be unaltered immediately after deprivation, as opposed to all being depressed as in Fig. 1b (middle). Since both scenarios would not change the relative strength of the two eyes until the inhibition is reduced, they both agree with experiments. Because of the variety of ODIs in the inputs, in practice inputs dominated by the closed eye fall below the plasticity threshold  $\theta_L$ , while inputs dominated by the open eye fall in the depression regime (Fig. 2c, top middle). Since the latter inputs are in the vast minority and since we will assume that excitatory-to-inhibitory plasticity has a faster action than excitatory-to-excitatory plasticity, this short period of open-eye LTD has a negligible and transient effect.

A more problematic consequence of introducing the low threshold is that MI now leads to counter-intuitive shifts (Fig. 2c bottom row, d). This can be easily understood since MI leads to both reduced presynaptic and postsynaptic rates compared to MD, which is exactly the regime we assumed for counter-intuitive shifts. However, this shift is not observed experimentally [Frenkel and Bear, 2004]. Raising both thresholds would in principle reduce this counter-intuitive shift, but also makes it increasingly hard for any LTP to occur. Another option would be to assume that the synaptic depression from excitatory-to-inhibitory (E-to-I) neurons is abolished under MI. While no experimental data is currently available for this case, synaptic depression from E-to-I neurons is still observed after BD [Feese et al., 2018].

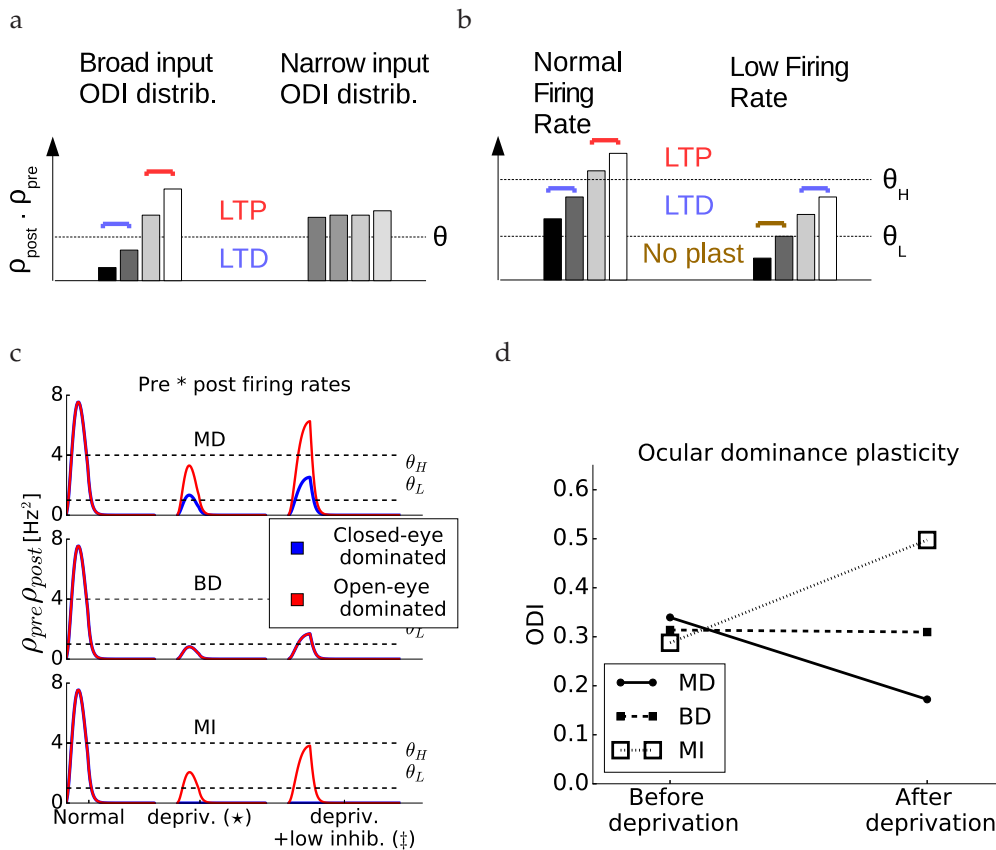

**Figure 2 Effects of heterogeneity.** (a) Schematic of presynaptic multiplied by postsynaptic firing rates after monocular deprivation, and assuming different ODI distributions of input neurons. If the ODI distribution is too narrow, it is harder for the threshold  $\theta$  to separate more closed-eye dominated inputs from more open-eye dominated inputs. (b) Schematic of presynaptic multiplied by postsynaptic firing rates after monocular deprivation, and assuming heterogeneous postsynaptic firing. Postsynaptic neurons that receive weaker inputs and fire at lower rates, lead to a depression of open-eye dominated inputs while leaving closed-eye dominated inputs unaltered. These neurons show a counter-intuitive shift towards the closed eye. (c) Examples of the product of presynaptic and postsynaptic firing rates of the neurons during MD, BD and MI. For red and blue traces, the product is taken with the most open-eye dominated and closed-eye dominated presynaptic neuron respectively. (d) Ocular dominance index of the postsynaptic neuron at the beginning of the simulation versus the end.

#### 4. Larger network simulations

Our toy model discussed in the previous sections only included feedforward excitatory-to-excitatory (E-to-E) plasticity onto a single layer II/III neuron. We now expand this model to a population of layer II/III neurons, while adding excitatory and inhibitory plasticity in all connections (Fig. 3a). The E-to-E plasticity rule remains the same as before, with a low threshold  $\theta_L$  below which no plasticity occurs, and a high threshold  $\theta_H$  separating synaptic depression from potentiation (Fig. 3b). For the E-to-I plasticity rule, we require that it is not too selective and that synaptic depression is induced after monocular deprivation. The first requirement follows from the experimental observation that inhibitory neurons are broadly tuned for orientations [Hofer et al., 2011], while the second requirement is necessary for ocular dominance plasticity in

our model. We therefore choose to model E-to-I plasticity using a modified version of the BCM-rule [Bienenstock et al., 1982] with hard upper bounds on the synaptic weights. We choose the target firing rate to be dependent on the visual experience. For normal binocular vision, a high target firing rate enables strengthening of inhibition and a reduced selectivity. For monocular deprivation, we halve the value of the target firing rate, and for BD and MI we reduce the target to 10% of the normal value. In this way we ensure that the level of inhibition reflects the input strength. Moreover, raising animals in complete darkness would never lead to a maturation of inhibition, as observed experimentally [Benevento et al., 1992, Fagiolini et al., 1994]. Finally, the I-to-E plasticity rule is a modified version of the rule proposed in Vogels et al. [Vogels et al., 2011], ensuring each excitatory neuron does not exceed a maximal firing rate (see details in the Methods section).

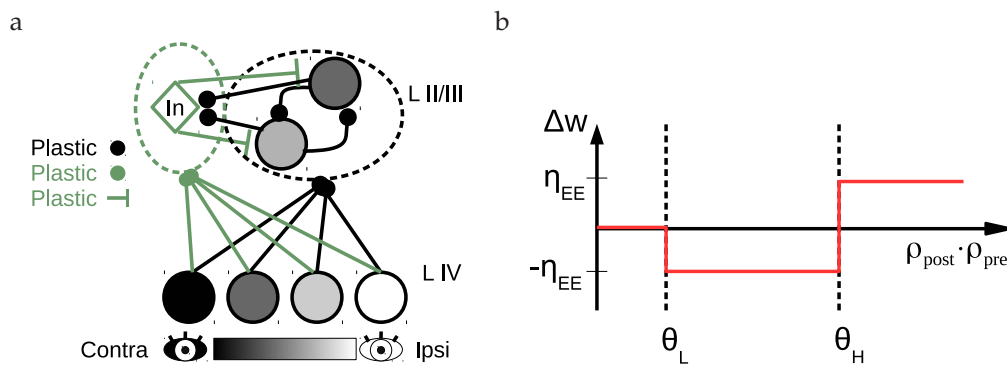

**Figure 3 Schematic of the network and excitatory learning rule.** (a) A cartoon of the network architecture. A population of presynaptic (layer IV) neurons with various ODs makes feedforward connections onto layer II/III excitatory and inhibitory neurons. Within the layer II/III, excitatory neurons have recurrent connections both to other excitatory neurons as well as to the inhibitory neurons, which in turn project back onto the excitatory neurons. (b) Schematic of the E-to-E plasticity rule. Low values for the product of presynaptic and postsynaptic rates do not lead to plasticity. Intermediate values result in synaptic depression, and high values in synaptic potentiation.

We assume a variety of ocular dominances in both layer IV and layer II/III neurons (see Methods and Supp.Fig. 1b), and a variety of excitatory firing rates. Moreover, we divide the layer IV neurons into five groups that are activated separately. These groups mimic the encoding of different input features, for example differently oriented lines within a receptive field. After an initial phase of the simulation where excitatory connections reach either upper or lower bounds, we simulate MD, BD and MI. Similar to the toy model, we simulate MD by reducing the contralateral eye to one third of the original value. At the end of the simulation, the mean response of layer II/III neurons shifted towards the open eye (Fig. 4a,d). This shift is mediated by a depression of closed-eye inputs, while open-eye inputs remain roughly the same (Fig. 4c). Individual neurons show a variety of OD shifts, and some neurons shift counter-intuitively towards the closed eye (Fig. 4b). When plotting the individual shifts versus the firing rate, it is clear that the counter-intuitive shifters are neurons with lower-than-average firing rates (Fig. 4e).



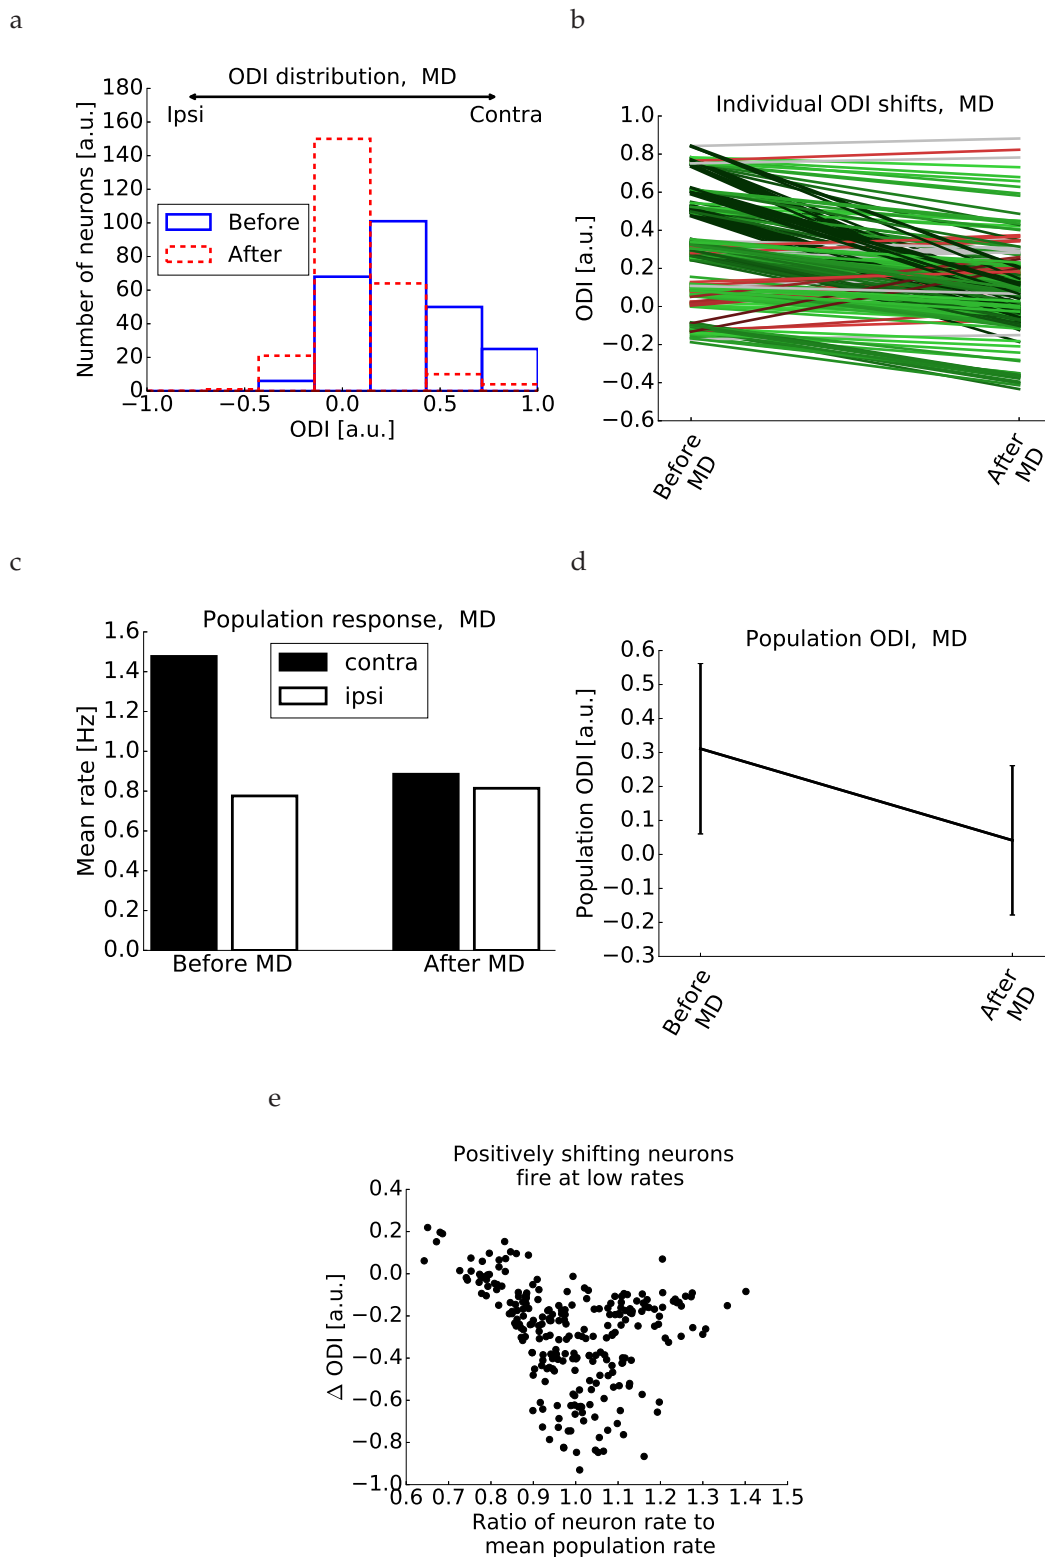

**Figure 4 Network simulations of MD.** (a) Distribution of ODI values of layer II/III neurons before MD (blue) and after MD (red). (b) Individual ODI shifts for all layer II/III neurons after MD. Green lines denote shifts towards the open eye. Red lines denote counter-intuitive shifts towards the closed eye. (c) Mean network response to contra- and ipsilateral eye, before and after MD. Errorbars denote one standard deviation. (d) Mean network ODI before and after MD. Errorbars denote one standard deviation. (e) Difference of ODI (final ODI - initial ODI) versus neuronal firing rate. The neuronal firing rates are divided by the population mean, hence values below 1 denote neurons with lower firing rates than the population average. Neurons that show a substantial positive shift have a value for this ratio below about 0.8.

We then simulate MI by completely abolishing contralateral inputs instead of just reducing them. Since the firing rates of all neurons are now shifted towards lower values, we observe a global counter-intuitive OD shift towards the closed eye (Fig. 5a,b). As discussed before, this is not observed experimentally and therefore a limitation of our model with two thresholds. Finally, we simulate BD by reducing both contralateral and ipsilateral inputs to a third of the original value. In this case, the mean ODI remains constant (Fig. 5c,d).

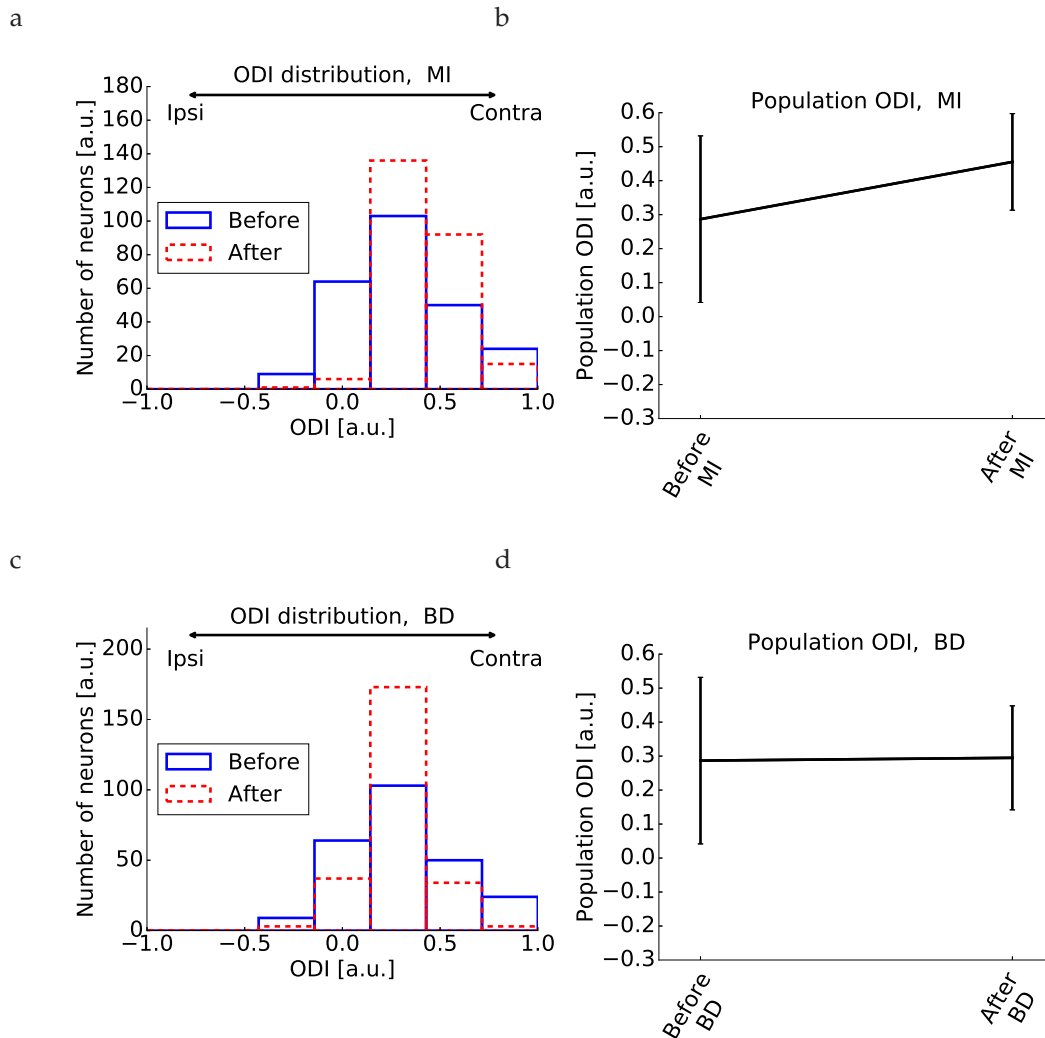

**Figure 5** Network simulations of MI and BD. (a,b) In our model of layer II/III, MI leads to a counter-intuitive shift. (c,d) BD does not lead to a population OD shift in our layer II/III model.

## 5. Onset and ending of the critical period

In order to simulate the maturation of the network, we first assume that our network starts from an 'immature', pre-critical-period state. In this state, the inhibitory and excitatory recurrent connections are still weak and the E-to-I connections start close to the minimum bound. Because of this, the inhibition cannot be sufficiently reduced after monocular deprivation (Fig. 6a). The

open-eye activity is therefore not amplified and no ocular dominance plasticity is observed (Fig. 6b).

In agreement with experimental data from Hofer et al. [Hofer et al., 2011], the choice of our learning rules ensure that E-to-E connections are input-selective while E-to-I connections are un-specific to the different inputs. Moreover, during the development, excitatory neurons increase their input selectivity over time while inhibitory neurons broaden their input tuning (Fig. 6c). This can be understood as follows. Both inhibitory and excitatory neurons start with a small bias for one input and therefore have a low selectivity index. However, our selective E-to-E rule ensures that excitatory neurons only develop strong connections with similarly tuned neurons (Fig. 6d, Supp. Fig. 3a), while the unselective E-to-I rule ensures that inhibitory neurons strengthen all incoming connections (Fig. 6e, Supp. Fig. 3b). This evolution is in qualitative agreement with experimental observations of input selectivity in juvenile mice [Kuhlman et al., 2011].

Finally, to account for the ending of the critical period, our model needs a mechanism that prevents the depression of the E-to-I connections [Kuhlman et al., 2013]. One candidate could be the consolidation of these E-to-I synapses. Indeed, when we do not allow for E-to-I plasticity, no shift is observed after MD (Fig. 6f).

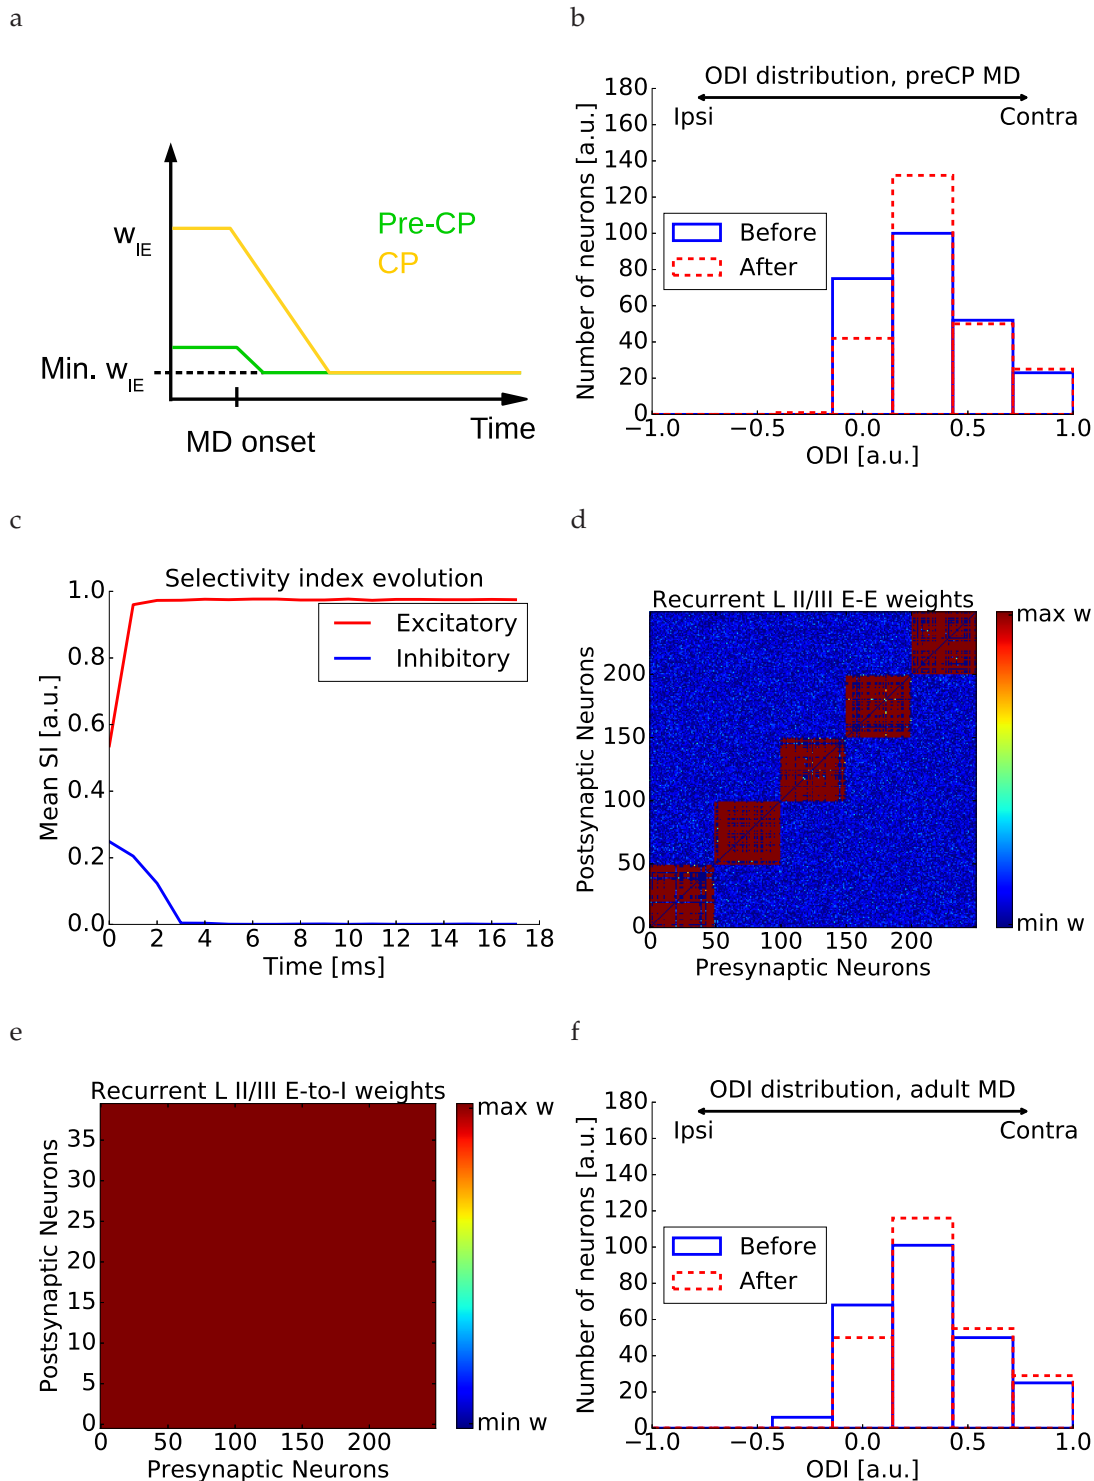

**Figure 6 Pre-CP and ending of the CP.** (a) In the pre-CP phase, the inhibition is still weak and close to the minimum value. Unlike CP mice, the inhibition cannot be sufficiently reduced before CP onset. (b) MD does not lead to OD shifts in the pre-CP mice. (c) In this pre-CP phase, the input selectivity index of excitatory neurons increases, while inhibitory neurons broaden their selectivity. This is in qualitative agreement with experimental data [Kuhlman et al., 2011]. (d) Recurrent E-to-E weights are specific, only synapses from one input group are strong, while other recurrent inputs are weak. (e) Recurrent E-to-I weights are unspecific, synapses from all input groups are at the maximum bound. (f) We simulate adult networks by preventing any E-to-I plasticity. MD in this case does not lead to a shift towards the open eye.

## Discussion

In this article, we simulated a simplified model of a layer II/III network in primary visual cortex. Our model is able to reproduce several experimentally observed features of the critical period for ocular dominance. In particular, we simulated changes caused by monocular deprivation and binocular deprivation. Furthermore, we discuss possible mechanisms for the onset and the end of the critical period. Our model therefore provides possible mechanistic insights into the development of cortical areas and the associated learning rules, which could be tested experimentally.

Our aim was to reproduce the effects of short deprivation (up to 3 days) on the ocular dominance of layer II/III neurons. We only considered plasticity in connections from layer IV to layer II/III and within layer II/III. Therefore, we ignored experimentally observed OD shifts in the thalamic relay neurons [Sommeijer et al., 2017, Jaepel et al., 2017] and layer IV neurons [Gordon and Stryker, 1996]. Since these areas are upstream of layer II/III, a naive explanation could be that the shift in layer II/III is fully accounted for by the shift in the inputs to this layer. However, Gordon and Stryker [Gordon and Stryker, 1996] described how a larger OD shift is observed in layer II/III compared to layer IV neurons, and similarly a larger shift in layer V/VI is observed compared to layer II/III. Considering the canonical flow of sensory inputs, from thalamus to layer IV, further to layer II/III and finally to layers V/VI, this result suggests that plastic changes happen at each stage and accumulate over layers. Furthermore, we do not aim to model longer deprivations (more than 3 days), when response potentiation is observed. In this case responses to both eyes - but mainly to the open eye - start to increase and therefore homeostatic plasticity mechanisms are a likely candidate to explain this second phase of OD plasticity [Turrigiano et al., 1998, Mrsic-Flogel et al., 2007, Espinosa and Stryker, 2012].

An increased inhibition is necessary in our model to open the critical period, because an already weak inhibition cannot be reduced sufficiently to rescue excitatory firing rates after monocular deprivation. Our hypothesis differs from previous theories on the opening of the critical period, which did not take into account the transient reduction of inhibition observed by Kuhlman et al. [Kuhlman et al., 2013]. For example, one interesting proposal is that the increased inhibition enhances the visual-to-spontaneous activity ratio [Toyoizumi et al., 2013], while another theory proposed that increasing inhibition favoured more coherent inputs over stronger inputs [Kuhlman et al., 2011]. It is possible that multiple of these mechanisms play a role in OD plasticity. For example, adding spontaneous activity in our model could counteract maturation if we assume that this spontaneous activity predominantly leads to synaptic depression, keeping the weights low and random. In this case maturation of V1 can only happen when the visual-to-spontaneous ratio is sufficiently high. This ratio could be gradually increased by the developmental changes in NMDA-receptor channels [Flint et al., 1997], nogo-receptors and myelination [McGee et al., 2005], inhibition [Toyoizumi et al., 2013] and changes in recurrent connectivity [Ko et al., 2013].

The end of the critical period is much less understood. Experiments suggest that the adult levels of inhibition are reached during the CP [Kuhlman et al., 2011]. Furthermore, Kuhlman et al. [Kuhlman et al., 2013] showed that in adult mice no reduction of inhibition is observed after one day of MD. This readily leads to the assumption that the E-to-I plasticity, which is crucial in our model to observe OD plasticity, is somehow abolished. We therefore implemented the end of the critical period as a consolidation of the E-to-I plasticity, which could be mediated by changes in the extracellular matrix. Indeed, perineuronal nets (PNNs), have been shown to develop around PV+ inhibitory neurons at the end of the critical period [Pizzorusso, 2002], and could affect the plasticity of synapses onto these PV+ neurons [Wang and Fawcett, 2012]. Furthermore, degrading the PNNs in adult animals restored a window for OD plasticity [Pizzorusso, 2002] and this

removal is related to reduced inhibition [Lensjø et al., 2017]. Another possibility is that the E-to-I plasticity rule itself prevents a reduction of inhibition in adults, for example due to changes in firing rates or correlations. Also the amount of silent synapses has been linked to the ability of juvenile-like plasticity [Huang et al., 2015]. The end of the critical period is characterized by the pruning of most of these silent synapses and a loss of PSD-95 in the adult leads to an increase in silent synapses as well as a recovery of OD plasticity. However, even though it was shown that the AMPA-to-NMDA ratio of excitatory synapses onto PV+ interneurons was similar in wild-type and PSD95-KO mice, it is not clear how a loss of PSD-95 affects E-to-I plasticity.

Our model brings certain predictions that could be experimentally tested. Firstly, we hypothesize that neurons showing a substantial OD shift after MD need to have a sufficient difference between the lowest and the highest ODI of the input synapses (Fig. 2 and Supp. Fig. 2). It could be possible that the active synapses have a narrower distribution, but that reducing the inhibition uncovers a broader distribution of silent synapses. In this way, both mechanisms discussed previously - the presence of silent synapses [Huang et al., 2015] and the reduction of inhibition [Kuhlman et al., 2013] - could contribute to OD plasticity. Moreover, in animals with columnar organisations of OD we would only expect a broad distribution to neurons on the edges between columns. Our model would then predict that only these neurons show a fast OD shift. Secondly, we introduce a low threshold in our plasticity rule separating no-plasticity from plasticity. Such a low threshold has been observed experimentally [Artola et al., 1990] and implemented in a modified version of the BCM-rule [Artola and Singer, 1993]. The low threshold allows us to reproduce the counter-intuitively shifting cells and provides an explanation to why they tend to have lower firing rates. However, adding this threshold in our model leads to a counter-intuitive shift after MI, which is not observed experimentally. Our model could be adapted in several ways to account for this. For example, a bigger reduction in firing rates even for ipsilaterally dominated neurons after MI, or a different rule for E-to-I plasticity which abolishes a reduction of inhibition after MI. Thirdly, we assume that the E-to-I plasticity rule depends on the excitatory population activity. In our case, this was implemented using different target firing rates under normal vision and after deprivation. Such a dependence on population activity has been observed in hippocampal I-to-E plasticity [Hartman et al., 2006], and it would be interesting to investigate whether and how E-to-I plasticity implements similar mechanisms.

To conclude, in this article we describe a theory of the development of cortical layer II/III. We implemented a simplified network with biologically plausible learning rules, which is able to reproduce multiple experimental results. With our model we hypothesize that:

- A substantial level of inhibition is necessary to observe OD plasticity, because a subsequent reduction of the inhibition is required to amplify open-eye inputs out of an LTD regime. The level of inhibition in immature networks is still too low and therefore not effective at amplifying excitation.
- A low threshold separating no-plasticity from LTD is sufficient to account for counter-intuitive shifts in neurons firing at lower rates.
- In adult animals, the reduction of inhibition is not observed [Kuhlman et al., 2013]. We hypothesize that network changes during the CP ultimately prevent E-to-I plasticity. These changes could for example be consolidation of E-to-I weights, changes in firing rates and/or changes in correlations.

## Methods

All neurons are modelled as rate units, where

$$\tau_i \frac{d\rho_i}{dt} = -\rho_i + \mathcal{G}_i \left( \sum_j w_{ij} \rho_j \right) \quad (1)$$

Here,  $\rho_i$  denotes the firing rate of neuron  $i$ ,  $\tau_i$  is the integration time constant and  $\mathcal{G}_i$  is the gain function. The summation over index  $j$  runs over all presynaptic neurons, and we assume  $w_{ij}$  positive in case of excitatory presynaptic neurons and negative in case of inhibitory presynaptic neurons. In all our simulations, we used a linear gain function  $\mathcal{G}(x) = g \cdot x$  with slope  $g = 0.3$  for all neurons. Finally, we used a time constant  $\tau_e = 3\text{ms}$  for excitatory neurons and  $\tau_i = 6\text{ms}$  for inhibitory neurons.

### 1. Toy Model

For our toy model, we simulated 250 presynaptic excitatory neurons, mimicking layer IV inputs, one postsynaptic inhibitory neuron and one postsynaptic excitatory neuron, mimicking layer II/III neurons. The inputs to the layer IV neurons were modelled as two equal step currents  $A_{\text{input}}^{\text{CL}}$  and  $A_{\text{input}}^{\text{IL}}$ , each representing one eye. Each input current was multiplied by a weight in order to generate different ocular dominances. The weights were generated as follows:

$$\begin{aligned} x &= 0.35 + 0.15\zeta \quad , \zeta \text{ randomly drawn from a standard normal distribution} \\ w_{\text{ipsi}} &= \begin{cases} 0 & \text{if } x < 0 \\ x & \text{if } 0 < x < 1 \\ 1 & \text{if } x > 1 \end{cases} \\ w_{\text{contra}} &= 1 - w_{\text{ipsi}} \end{aligned} \quad (2)$$

In other words, for each layer IV neuron, a random number was generated from a normal distribution with mean 0.35 and standard deviation 0.15. The resulting random numbers were rectified, i.e. negative numbers were set to 0, and numbers larger than 1 were set to 1. These numbers were chosen as the weights for the ipsilateral inputs to the layer IV neurons, while one minus the ipsilateral weights were the contralateral weights. In this way, each layer IV neuron received an equal amount of input, but with different ocular dominance. An example of the OD distribution for the layer IV inputs is shown in Supp. Fig. 1a.

From the 250 layer IV neurons, 50 connections are made to the layer II/III excitatory and inhibitory neurons. The 250 layer IV neurons are divided in five groups of 50 neurons according to ocular dominance, and from each group 10 neurons are randomly chosen to make connections to the layer II/III excitatory neuron (except for Supp. Fig. 2, where we choose all 50 connections from the third group). In this way, the layer II/III excitatory neurons receives inputs with a range of different ODs. In contrast, we chose the 25 most ipsilaterally dominated layer IV neurons and the 25 most contralaterally dominated layer IV neurons as inputs to the inhibitory neuron, since inhibitory neurons are more binocular than excitatory neurons [Kuhlman et al., 2013].

For simulations of Fig. 1 the feedforward E-to-E connections from layer IV to the layer II/III neuron ( $w_{\text{EE}}$ ) are plastic under the learning rule given by the following equation

$$\Delta w_{\text{EE}} = \eta_{\text{EE}} \cdot \text{sgn} \left( (\rho_{\text{pre}} \cdot \rho_{\text{post}})^{\text{max}} - \theta \right) \quad (3)$$

The parameter  $\theta$  is a threshold separating synaptic depression from synaptic potentiation. For simulations of Fig. 2, an extra threshold is introduced

$$\Delta w_{EE} = \begin{cases} \eta_{EE} \cdot \text{sgn}((\rho_{\text{pre}} \cdot \rho_{\text{post}})^{\text{max}} - \theta_H) & \text{if } (\rho_{\text{pre}} \cdot \rho_{\text{post}})^{\text{max}} > \theta_L \\ 0 & \text{if } (\rho_{\text{pre}} \cdot \rho_{\text{post}})^{\text{max}} < \theta_L \end{cases} \quad (4)$$

This learning rule is shown schematically in Fig. 3b. Here, the parameter  $\theta_H$  is a threshold separating synaptic depression from synaptic potentiation, while  $\theta_L$  is a threshold below which no plasticity occurs. In both equations 3 and 4,  $\eta_{EE}$  is the learning rate and the function  $\text{sgn}(x)$  denotes the sign function and is equal to 1 if  $x > 0$ , equal to 0 if  $x = 0$  and equal to -1 if  $x < 0$ . Finally, the  $\text{max}$  denotes the maximum value in response to a visual stimulus. This maximum is calculated over each of the 50ms following a stimulus onset (see below, 10ms active input and 40ms silent). The plastic weights are constraint by hard lower and upper bounds, and all other weights (E-to-I, I-to-E) are static.

We start the simulations with the  $w_{EE}$  at the upper bound. The duration of the simulations is 10s, with timesteps of 0.5ms. We alternated activation of the inputs to the layer IV neurons (10ms at a constant value  $A_{\text{input}}^{\text{CL}} = A_{\text{input}}^{\text{IL}} = 10$  Hz) with disactivation ( $A_{\text{input}}^{\text{CL}} = A_{\text{input}}^{\text{IL}} = 0$ Hz for 40ms). After 500ms, we simulated deprivation. In case of monocular deprivation, we reduced the contralateral input to one third of its original value,  $A_{\text{input, MD}}^{\text{CL}} = 0.33A_{\text{input}}^{\text{CL}}$ . In the case of monocular inactivation, we reduced this input to zero,  $A_{\text{input, MD}}^{\text{CL}} = 0$ , and in the case of binocular deprivation, we reduced both inputs to a third of the original value,  $A_{\text{input, MD}}^{\text{CL}} = A_{\text{input, MD}}^{\text{IL}} = 0.33A_{\text{input}}^{\text{CL}}$ . The values of all parameters used during the simulation can be found in Table 1.

## 2. Network

We simulated 1250 layer IV neurons, 250 layer II/III excitatory neurons and 40 layer II/III inhibitory neurons. The layer IV neurons are divided into five groups of 250, each representing a different input feature (e.g. a different orientation). Similarly, the layer II/III excitatory neurons are divided into five groups of 50 neurons. Each layer II/III neuron received 50 connections from each of the five layer IV groups (hence 250 feedforward synapses in total). However, connections from layer IV neurons of the same group were initialized at  $0.5 * w_{EE}^{\text{max}}$ , while other feedforward connections were initialized ten times smaller. In this way, an initial orientation preference at eye-opening was mimicked [Ko et al., 2013].

Moreover, the feedforward connections were not chosen randomly. If we would randomly pick these inputs, the probability to have very ipsilaterally or contralaterally dominated neurons in layer II/III is low, and instead all neurons would have an ODI close to the layer IV population ODI (Supp. Fig. 1a). Therefore, the connections were set to result in a broader ODI distribution in layer II/III. We outline below how we set 50 feedforward connections from one group of 250 layer IV neurons. The same is valid for the four other input groups representing the other orientations. The 250 layer IV neurons representing one orientation are divided into groups according to ocular dominance,  $O_1$  to  $O_5$ . We then ensured a broad ODI distribution in layer II/III as follows. We choose  $x$  layer II/III neurons and randomly make  $y_i$  connections from  $O_i$  to these neurons, with  $x$  and  $y_i$  given below.



| $x$ | $y_1$ | $y_2$ | $y_3$ | $y_4$ | $y_5$ |
|-----|-------|-------|-------|-------|-------|
| 25  | 40    | 5     | 0     | 0     | 5     |
| 50  | 5     | 40    | 0     | 0     | 5     |
| 100 | 5     | 0     | 40    | 0     | 5     |
| 50  | 5     | 0     | 0     | 40    | 5     |
| 25  | 10    | 0     | 0     | 0     | 40    |

This ensured both a broad distribution in layer II/III neurons (Supp. Fig. 1b), as well as enough contralaterally and ipsilaterally dominated inputs to each layer II/III neuron. The latter is important to be able to observe an OD shift in our model (see Results).

Recurrent E-to-E connections between the 250 layer II/III neurons were initialized randomly, as observed at eye-opening [Ko et al., 2013]. To this end, we picked random numbers from a normal distribution with mean and standard deviation equal to 5% of the maximum weight, and ensured values below the minimum weight were reset at this minimum weight.

For each of the 40 inhibitory neurons we randomly picked one of the input groups representing an orientation, to which it made 50 strong initial connections equal to the maximum weight, while 50 connections from each of the other input groups were initialized at the minimum weight. Similarly to the toy model, we always chose the 25 most ipsilateral dominated inputs and the 25 most contralateral dominated inputs in each input group. Finally, all feedforward input strengths from layer IV to layer II/III excitatory and inhibitory neurons are multiplied by a factor of 5 to mimic a larger input population.

The feedforward and recurrent E-to-E plasticity rule is given by equation 4. This learning rule is shown schematically in Fig. 3b.

The E-to-I plasticity rule is a BCM-type rule [Bienenstock et al., 1982], given by

$$\Delta w_{IE} = \eta_{IE} \cdot \rho_{pre}^{\max} \rho_{post}^{\max} \cdot (\rho_{post}^{\max} - \theta_{BCM}) \quad (5)$$

Here,  $\theta_{BCM}$  is a sliding threshold given by  $(\langle \rho_{post}^{\max} \rangle)^2 / \rho_{target}$ . The average of the peak postsynaptic firing rate  $\langle \rho_{post}^{\max} \rangle$  is calculated online by low-pass filtering with a long time constant,

$$\tau_{avg} \frac{d \langle \rho_{post}^{\max} \rangle}{dt} = - \langle \rho_{post}^{\max} \rangle + \rho_{post}^{\max} \quad (6)$$

The  $\rho_{target}$  is a target firing rate for the inhibitory neurons, and was chosen to be 15 Hz for normal vision, but reduced to half this value after MD and 10% of this value after MI and BD. Finally, the I-to-E plasticity rule is based on the rule in Vogels et al. [Vogels et al., 2011].

$$\Delta w_{EI} = \begin{cases} \rho_{pre}(\rho_{post} - \phi_H) & , \text{if } \rho_{post} > \phi_L \\ 0 & , \text{if } \rho_{post} < \phi_L \end{cases} \quad (7)$$

By choosing the lower threshold for plasticity  $\phi_L$  at a high value, close to but below  $\phi_H$ , this rule limits the maximum firing rates of the excitatory neurons but does not homeostatically increase the firing rate when sudden drops occur (for example after MD).

To simulate heterogeneous firing rates, for each layer II/III neuron we generate a random number  $x = 1 + 0.15\zeta$ , with  $\zeta$  drawn from a standard normal distribution. We then multiply all the rates

of the presynaptic neurons of a layer II/III neuron by the respective random number  $x$  (thus either increasing or decreasing all presynaptic rates), while also multiplying the  $\phi_H$  of equation 7 for all I-to-E synapses to this layer II/III neuron with  $x$  (thus increasing or decreasing the maximal postsynaptic rate by an equal amount as the presynaptic rates). The threshold  $\phi_L$  was always a fixed amount lower than  $\phi_H$ .

The first phase of the simulation lasts 60s. In this phase, the excitatory and inhibitory connections develop and reach either the maximum or minimum bound. Furthermore, MD does not lead to OD shifts because initially, the inhibition is weak and reducing inhibition cannot enhance the excitation sufficiently.

After this first phase ensured stationary weights and a sufficiently high sliding threshold, we simulate the deprivation. This second phase lasts 30s. Similarly as in the toy model, we model MD by reducing the contralateral input to layer IV by a two thirds, BD by reducing both ipsilateral and contralateral inputs by two thirds, and MI by setting the contralateral input to zero. To simulate adult animals, we do not allow any plasticity from E-to-I connections. To simulate pre-CP deprivation, we reduce the first phase of the simulation to 5s instead of 60s, ensuring that the excitatory and inhibitory weights are still low.

### 3. ODI and selectivity index

The ocular dominance index (ODI) was calculated as

$$\text{ODI} = \frac{\text{CL} - \text{IL}}{\text{CL} + \text{IL}} \quad (8)$$

where CL stands for the maximum response to a contralateral input, and IL stands for the maximum response to an ipsilateral input. In this way, a neuron with ODI=1 is completely monocular for the contralateral eye, while a neuron with ODI=-1 is completely monocular for the ipsilateral eye.

The input selectivity index (SI) was calculated as one minus the circular variance. We first calculated the maximal response  $a_j$  of a neuron to each of the  $N=5$  inputs, and sorted these responses from large to small ( $a_1$  is the largest and  $a_5$  the smallest). Then, we calculated

$$\mathbf{r} = \left( \sum_{n=1}^N a_j \cdot e^{i\frac{2\pi}{N}n} \right) / a_{\text{tot}} \\ \text{SI} = |\mathbf{r}| \quad (9)$$

where  $a_{\text{tot}} = \sum_{n=1}^N a_j$ . In this way, a neuron that is active for one input but silent for all other inputs will have an SI equal to 1, while an input that is equally active for all inputs will have an SI equal to 0.

**Table 1: model parameters**

|                                        |                                                               |                                     |
|----------------------------------------|---------------------------------------------------------------|-------------------------------------|
| Timestep                               | $dt$                                                          | 0.5 ms                              |
| Gain function (slope)                  | $g_e = g_i$                                                   | 0.3                                 |
| E time constant                        | $\tau_e$                                                      | 3 ms                                |
| I time constant                        | $\tau_i$                                                      | 6 ms                                |
| Nr. of L II/III exc. neurons           | $NE_{L3}$                                                     | 250                                 |
| Nr. of L IV exc. neurons               | $NE_{L4}$                                                     | 1250                                |
| Nr. of L II/III inh. neurons           | $NI_{L3}$                                                     | 40                                  |
| Nr. of ffw connections per input group | $N_{ffw}$                                                     | 50                                  |
| Max. E to E weight                     | $w_{EE}^{\max}$                                               | $2/N_{ffw}$                         |
| Min. E to E weight                     | $w_{EE}^{\min}$                                               | $w_{EE}^{\max}/1000$                |
| High threshold EE                      | $\theta_H$                                                    | $4 \text{ Hz}^2$                    |
| Low threshold EE                       | $\theta_L$                                                    | $1 \text{ Hz}^2$                    |
| Learning rate EE                       | $\eta_{EE}$                                                   | $8 \cdot 10^{-4} \text{ Hz}^{-2}$   |
| Max. I to E weight                     | $w_{EI}^{\max}$                                               | $\infty$                            |
| Min. I to E weight                     | $w_{EI}^{\min}$                                               | $0.025 / NI_{L3}$                   |
| High threshold I to E                  | $\phi_H$                                                      | mean: 2 Hz (see methods)            |
| Low threshold I to E                   | $\phi_L$                                                      | $\phi_H - 0.35 \text{ Hz}$          |
| Learning rate I to E                   | $\eta_{EI}$                                                   | $2.5 \cdot 10^{-3} \text{ Hz}^{-2}$ |
| Max. E to I weight                     | $w_{IE}^{\max}$                                               | $4/N_{ffw}$                         |
| Min. E to I weight                     | $w_{IE}^{\min}$                                               | $0.3 \cdot w_{IE}^{\max}$           |
| Learning rate E to I                   | $\eta_{IE}$                                                   | $5 \cdot 10^{-5} \text{ Hz}^{-3}$   |
| E to I target rate (normal vision)     | $\rho_{\text{target}}$                                        | 15 Hz                               |
| BCM time constant                      | $\tau_{\text{avg}}$                                           | 7500 ms                             |
| Inputs to L IV                         | $A_{\text{input}}^{\text{CL}} = A_{\text{input}}^{\text{IL}}$ | 10 Hz                               |

## References

- [Artola et al., 1990] Artola, a., Bröcher, S., and Singer, W. (1990). Different voltage-dependent thresholds for inducing long-term depression and long-term potentiation in slices of rat visual cortex.
- [Artola and Singer, 1993] Artola, A. and Singer, W. (1993). Long-term depression of excitatory synaptic transmission and its relationship to long-term potentiation. *Trends in neurosciences*, 16(11):480–7.
- [Benevento et al., 1992] Benevento, L. A., Bakkum, B. W., Port, J. D., and Cohen, R. S. (1992). The effects of dark-rearing on the electrophysiology of the rat visual cortex. *Brain Research*, 572(1-2):198–207.
- [Bienenstock et al., 1982] Bienenstock, E. L., Cooper, L. N., and Munro, P. W. (1982). Theory for the development of neuron selectivity: orientation specificity and binocular interaction in visual cortex. *The Journal of neuroscience : the official journal of the Society for Neuroscience*, 2(1):32–48.
- [Espinosa and Stryker, 2012] Espinosa, J. S. and Stryker, M. P. (2012). Development and Plasticity of the Primary Visual Cortex. *Neuron*, 75(2):230–249.
- [Fagiolini and Hensch, 2000] Fagiolini, M. and Hensch, T. K. (2000). Inhibitory threshold for critical-period activation in primary visual cortex. *Nature*, 404(6774):183–186.

- [Fagiolini et al., 1994] Fagiolini, M., Pizzorusso, T., Berardi, N., Domenici, L., and Maffei, L. (1994). Functional postnatal development of the rat primary visual cortex and the role of visual experience: dark rearing and monocular deprivation. *Vision research*, 34(6):709–720.
- [Feese et al., 2018] Feese, B. D., Pafundo, D. E., Schmehl, M. N., and Kuhlman, S. J. (2018). Binocular deprivation induces both age-dependent and age-independent forms of plasticity in parvalbumin inhibitory neuron visual response properties. *Journal of Neurophysiology*, 119(2):738–751.
- [Flint et al., 1997] Flint, A., Maisch, U., Weishaupt, J., Kriegstein, A., and Monyer, H. (1997). NR2A subunit expression shortens NMDA receptor synaptic currents in developing neocortex. *The Journal of neuroscience : the official journal of the Society for Neuroscience*, 17(7):2469–2476.
- [Frenkel and Bear, 2004] Frenkel, M. Y. and Bear, M. F. (2004). How monocular deprivation shifts ocular dominance in visual cortex of young mice. *Neuron*, 44(6):917–923.
- [Gordon and Stryker, 1996] Gordon, J. A. and Stryker, M. P. (1996). Experience-dependent plasticity of binocular responses in the primary visual cortex of the mouse. *The Journal of Neuroscience*, 16(10):3274–86.
- [Greifzu et al., 2014] Greifzu, F., Pielecka-Fortuna, J., Kalogeraki, E., Krempler, K., Favaro, P. D., Schlüter, O. M., and Löwel, S. (2014). Environmental enrichment extends ocular dominance plasticity into adulthood and protects from stroke-induced impairments of plasticity. *Proceedings of the National Academy of Sciences*, 111(3):1150–1155.
- [Harauzov et al., 2010] Harauzov, A., Spolidoro, M., DiCristo, G., De Pasquale, R., Cancedda, L., Pizzorusso, T., Viegi, A., Berardi, N., and Maffei, L. (2010). Reducing Intracortical Inhibition in the Adult Visual Cortex Promotes Ocular Dominance Plasticity. *Journal of Neuroscience*, 30(1):361–371.
- [Hartman et al., 2006] Hartman, K. N., Pal, S. K., Burrone, J., and Murthy, V. N. (2006). Activity-dependent regulation of inhibitory synaptic transmission in hippocampal neurons. *Nature Neuroscience*, 9(5):642–649.
- [Hofer et al., 2011] Hofer, S. B., Ko, H., Pichler, B., Vogelstein, J., Ros, H., Zeng, H., Lein, E., Lesica, N. a., and Mrsic-Flogel, T. D. (2011). Differential connectivity and response dynamics of excitatory and inhibitory neurons in visual cortex. *Nature neuroscience*, 14(8):1045–52.
- [Huang et al., 2015] Huang, X., Stodieck, S. K., Goetze, B., Cui, L., Wong, M. H., Wenzel, C., Hosang, L., Dong, Y., Löwel, S., and Schlüter, O. M. (2015). Progressive maturation of silent synapses governs the duration of a critical period. *Proceedings of the National Academy of Sciences*, 112(24):E3131–E3140.
- [Jaepel et al., 2017] Jaepel, J., Hübener, M., Bonhoeffer, T., and Rose, T. (2017). Lateral geniculate neurons projecting to primary visual cortex show ocular dominance plasticity in adult mice. *Nature Neuroscience*, 20(12):1708–1714.
- [Jeon and Kuhlman, 2017] Jeon, B. B. and Kuhlman, S. J. (2017). The underdog pathway gets a boost. *Nature Neuroscience*, 20(12):1655–1656.
- [Ko et al., 2013] Ko, H., Cossell, L., Baragli, C., Antolik, J., Clopath, C., Hofer, S. B., and Mrsic-Flogel, T. D. (2013). The emergence of functional microcircuits in visual cortex. *Nature*, 496(7443):96–100.
- [Kuhlman et al., 2013] Kuhlman, S. J., Olivas, N. D., Tring, E., Ikrar, T., Xu, X., and Trachtenberg, J. T. (2013). A disinhibitory microcircuit initiates critical-period plasticity in the visual cortex. *Nature*, 501(7468):543–6.

- [Kuhlman et al., 2011] Kuhlman, S. J., Tring, E., and Trachtenberg, J. T. (2011). Fast-spiking interneurons have an initial orientation bias that is lost with vision. *Nature neuroscience*, 14(9):1121–1123.
- [Lensjø et al., 2017] Lensjø, K. K., Lepperød, M. E., Dick, G., Hafting, T., and Fyhn, M. (2017). Removal of Perineuronal Nets Unlocks Juvenile Plasticity Through Network Mechanisms of Decreased Inhibition and Increased Gamma Activity. *The Journal of Neuroscience*, 37(5):1269–1283.
- [Matthies et al., 2013] Matthies, U., Balog, J., and Lehmann, K. (2013). Temporally Coherent Visual Stimuli Boost Ocular Dominance Plasticity. *Journal of Neuroscience*, 33(29):11774–11778.
- [McGee et al., 2005] McGee, A. W., Yang, Y., Fischer, Q. S., Daw, N. W., and Strittmatter, S. M. (2005). Experience-driven plasticity of visual cortex limited by myelin and Nogo receptor. *Science (New York, N.Y.)*, 309(5744):2222–6.
- [Mrsic-Flogel et al., 2007] Mrsic-Flogel, T. D., Hofer, S. B., Ohki, K., Reid, R. C., Bonhoeffer, T., and Hübener, M. (2007). Homeostatic Regulation of Eye-Specific Responses in Visual Cortex during Ocular Dominance Plasticity. *Neuron*, 54(6):961–972.
- [Pizzorusso, 2002] Pizzorusso, T. (2002). Reactivation of Ocular Dominance Plasticity in the Adult Visual Cortex. *Science*, 298(5596):1248–1251.
- [Reiter and Stryker, 1988] Reiter, H. O. and Stryker, M. P. (1988). Neural plasticity without postsynaptic action potentials: less-active inputs become dominant when kitten visual cortical cells are pharmacologically inhibited. *Proceedings of the National Academy of Sciences of the United States of America*, 85(10):3623–3627.
- [Rose et al., 2016] Rose, T., Jaepel, J., Hubener, M., and Bonhoeffer, T. (2016). Cell-specific restoration of stimulus preference after monocular deprivation in the visual cortex. *Science*, 352(6291):1319–1322.
- [Sawtell et al., 2003] Sawtell, N. B., Frenkel, M. Y., Philpot, B. D., Nakazawa, K., Tonegawa, S., and Bear, M. F. (2003). NMDA receptor-dependent ocular dominance plasticity in adult visual cortex. *Neuron*, 38(6):977–985.
- [Smith and Trachtenberg, 2007] Smith, S. L. and Trachtenberg, J. T. (2007). Experience-dependent binocular competition in the visual cortex begins at eye opening. *Nature Neuroscience*, 10(3):370–375.
- [Sommeijer et al., 2017] Sommeijer, J. P., Ahmadlou, M., Saiepour, M. H., Seignette, K., Min, R., Heimel, J. A., and Levelt, C. N. (2017). Thalamic inhibition regulates critical-period plasticity in visual cortex and thalamus. *Nature Neuroscience*, 20(12):1716–1721.
- [Toyoizumi et al., 2013] Toyoizumi, T., Miyamoto, H., Yazaki-Sugiyama, Y., Atapour, N., Hensch, T. K., and Miller, K. D. (2013). A Theory of the Transition to Critical Period Plasticity: Inhibition Selectively Suppresses Spontaneous Activity. *Neuron*, 80(1):51–63.
- [Turrigiano et al., 1998] Turrigiano, G. G., Leslie, K. R., Desai, N. S., Rutherford, L. C., and Nelson, S. B. (1998). Activity-dependent scaling of quantal amplitude in neocortical neurons. *Nature*, 391(6670):892–896.
- [Vogels et al., 2011] Vogels, T. P., Sprekeler, H., Zenke, F., Clopath, C., and Gerstner, W. (2011). Inhibitory plasticity balances excitation and inhibition in sensory pathways and memory networks. *Science (New York, N.Y.)*, 334(6062):1569–1573.

[Wang and Fawcett, 2012] Wang, D. and Fawcett, J. (2012). The perineuronal net and the control of cns plasticity. *Cell and Tissue Research*, 349(1):147–160.

## Acknowledgements

This work has been support by the Wellcome Trust and the BBSRC.

## Supplementary Information

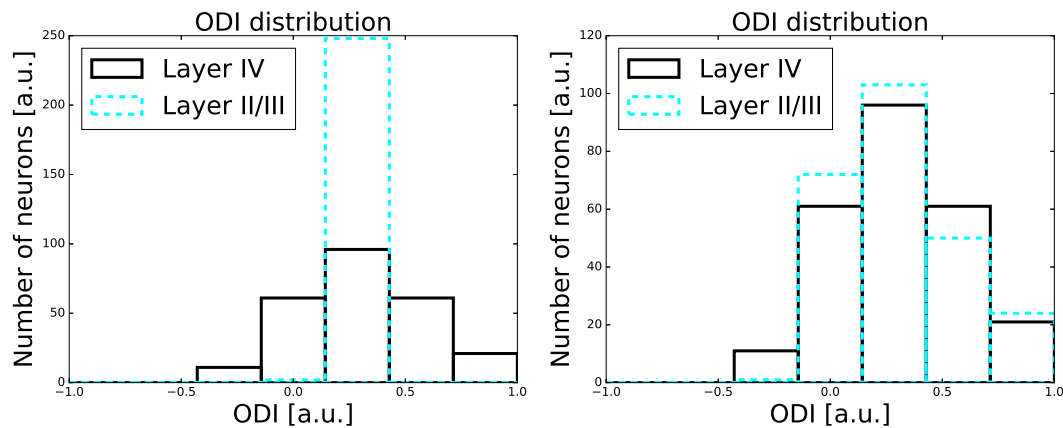

**Supplementary Figure 1** (a) Choosing connections randomly from layer IV to layer II/III neurons would result in a narrow distribution for layer II/III ODI. (b) Adding specificity in connections from layer IV to layer II/III neurons results in a broader distribution for layer II/III ODI.

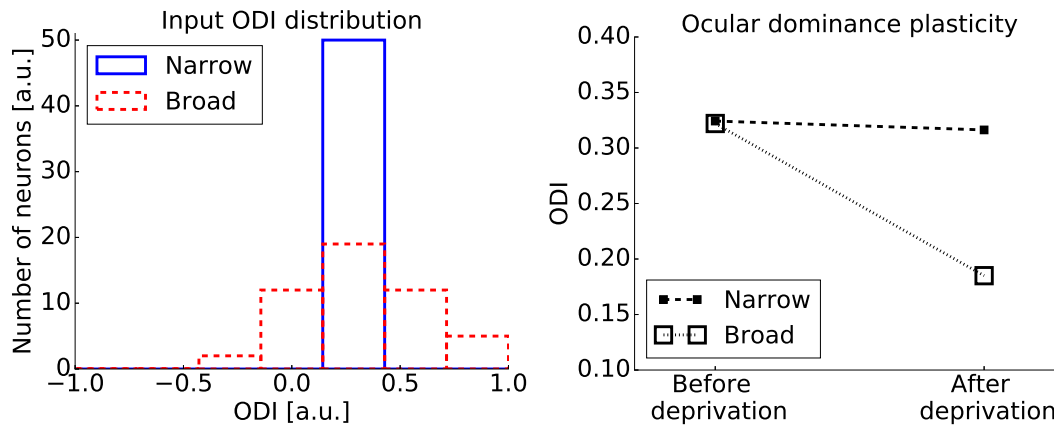

**Supplementary Figure 2** How the input distribution affects OD shifts. (a) A layer II/III neuron receives inputs with either a narrow ODI distribution (blue) or a broad distribution (red). (b) Layer II/III neurons with similar ODI index only show an OD shift after MD when the inputs have a broad ODI distribution.

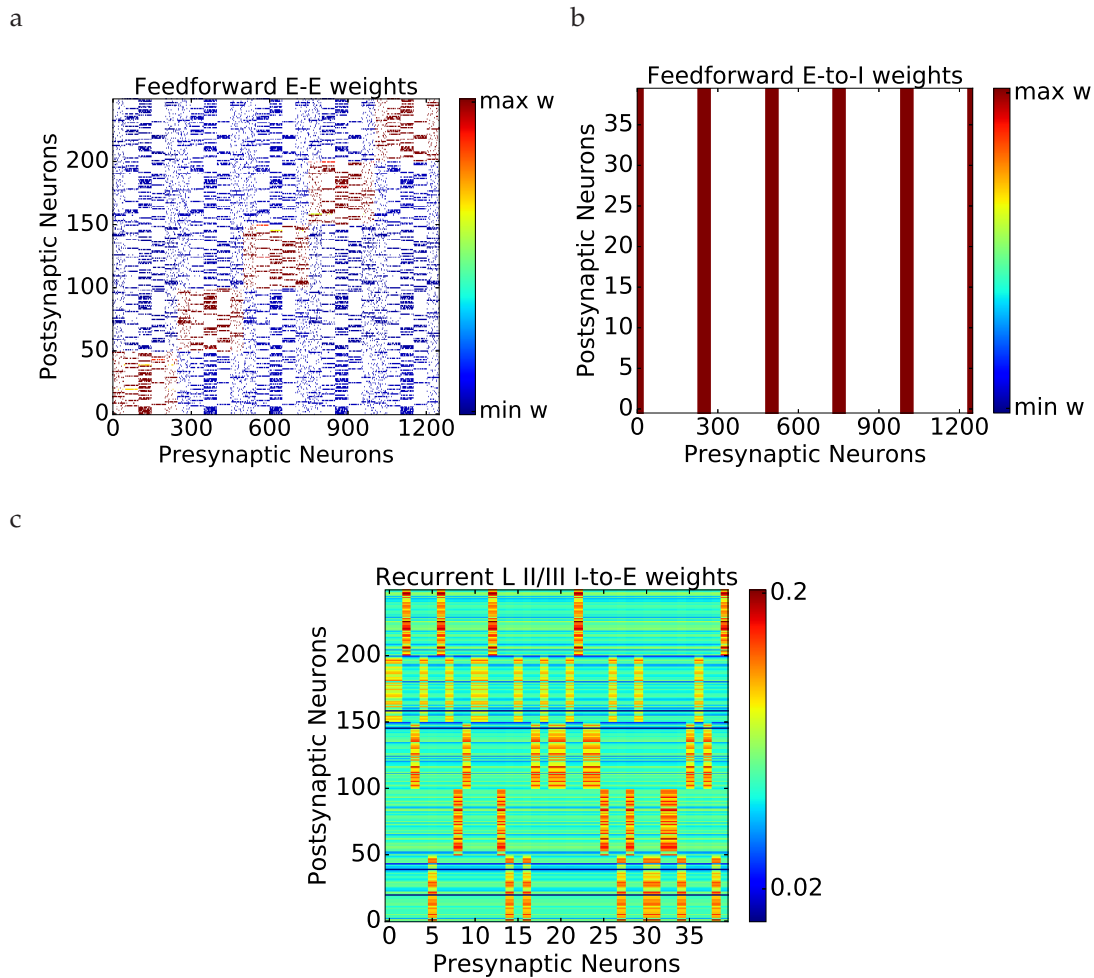

**Supplementary Figure 3 Synaptic Weights after first learning phase.** (a) Feedforward E-to-E weights are specific, only synapses from one input group are strong, while other feedforward inputs are weak. Only 50 feedforward connections per input group are made, white denotes no connection (see Methods). (b) Feedforward E-to-I weights are unspecific, synapses from all input groups are at the maximum bound. Only 50 feedforward connections per input group are made, white denotes no connection (see Methods). (c) Recurrent I-to-E weights after the first learning phase.
